# Supplementary material for: Using QuEChERS and HPLC Method to Monitor the Background Concentration of Polycyclic Aromatic Hydrocarbons in Commercial Black Tea Leaves and Infusions in Taiwan
Source: MDPI journal article supplement (doi:10.3390/toxics12020148), 2024-02-14
Supplement: s1 [file s1]

**Supplementary Materials:** The following supporting information can be downloaded at: [www.mdpi.com/xxx/s1](http://www.mdpi.com/xxx/s1)

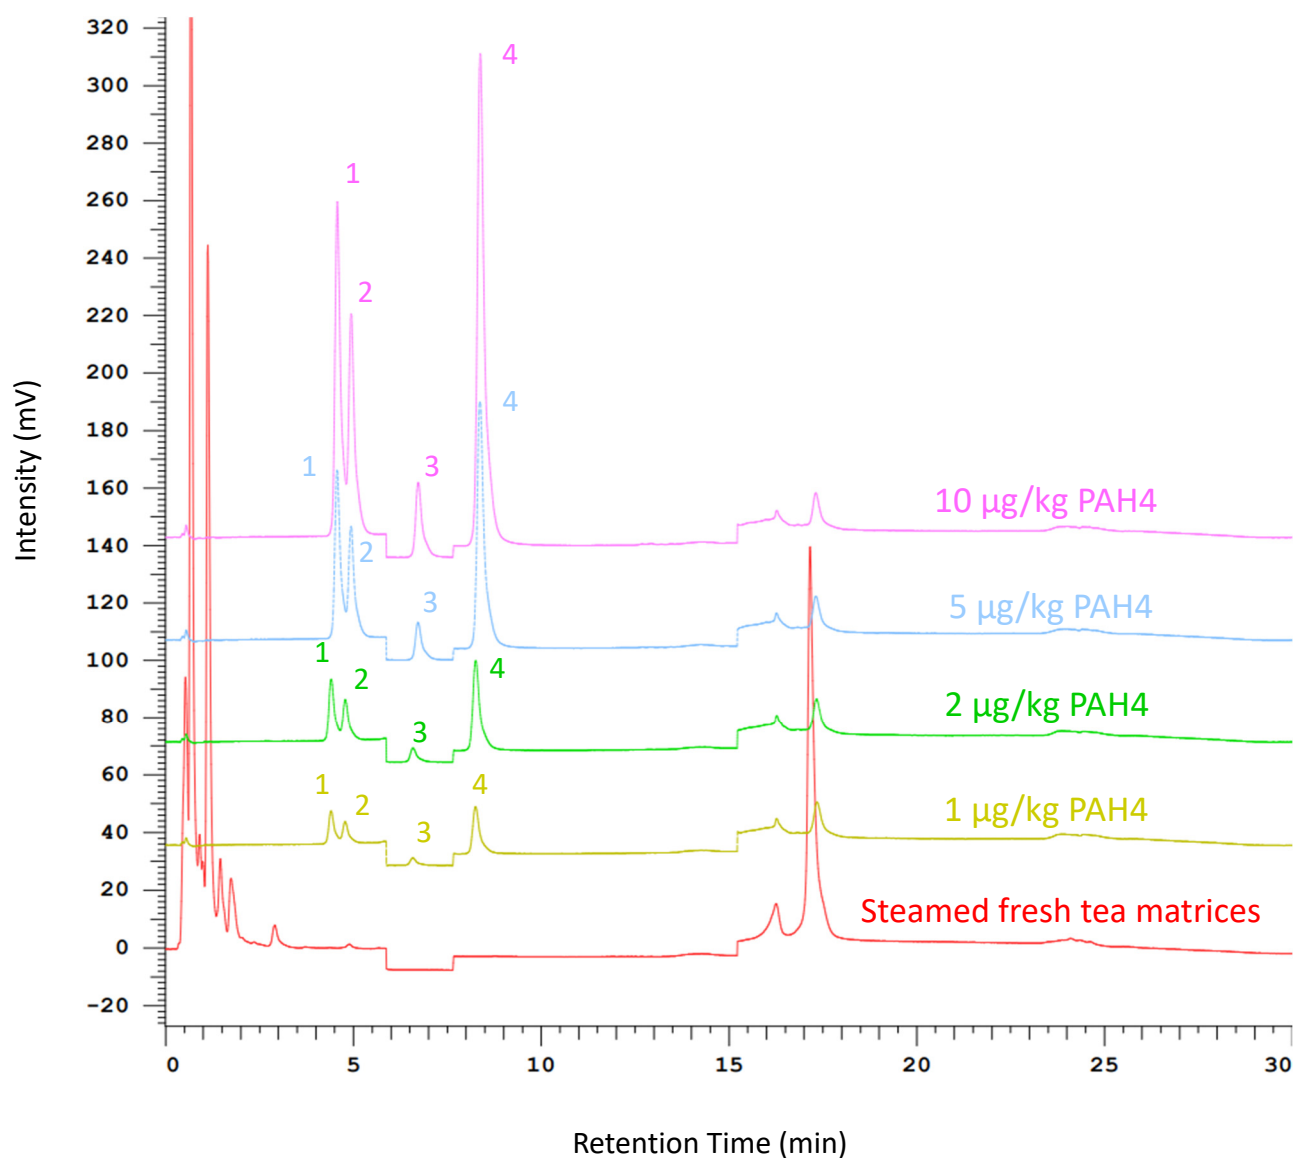

Figure S1. Chromatograms of the extracts from steamed *Camellia sinensis* matrices spiked with various concentrations of PAH4. Peak: 1: Benzo[a]anthracene (BaA), 2: Chrysene (CHR), 3: Benzo[b]fluoranthene (BbF), 4: Benzo[a]Pyrene (BaP).

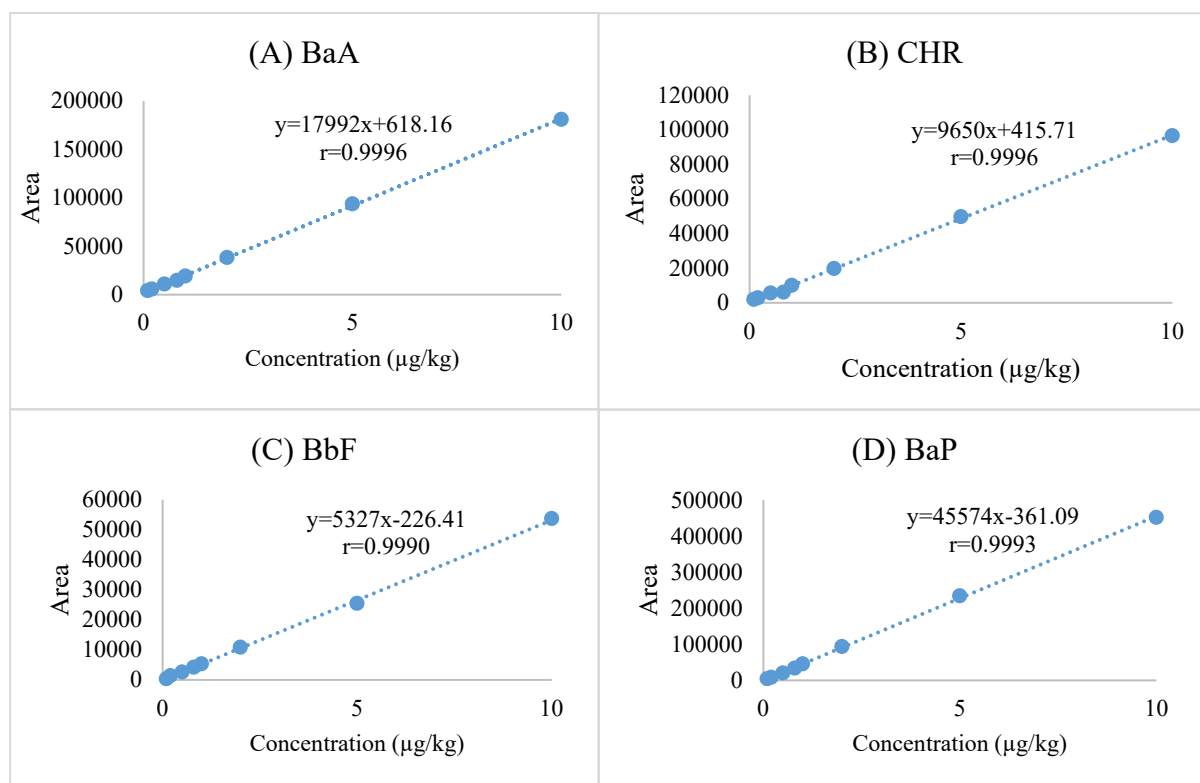

Figure S2. HPLC analysis calibration curve of BaA, CHR, BbF and BaP in this study.

Table S1. Country of origin and sampling location of black tea samples.

| <b>Sample Number</b> | <b>Country of Origin</b> | <b>Group</b> | <b>Location</b> |
|----------------------|--------------------------|--------------|-----------------|
| 1                    | Taiwan                   | Loose Leaf   | Factory         |
| 2                    | Taiwan                   | Loose Leaf   | Factory         |
| 3                    | Taiwan                   | Loose Leaf   | Factory         |
| 4                    | Taiwan                   | Loose Leaf   | Factory         |
| 5                    | Taiwan                   | Loose Leaf   | Factory         |
| 6                    | Taiwan                   | Loose Leaf   | Supermarket     |
| 7                    | Taiwan                   | Loose Leaf   | Supermarket     |
| 8                    | Taiwan                   | Loose Leaf   | Factory         |
| 9                    | Taiwan                   | Loose Leaf   | Supermarket     |
| 10                   | Taiwan                   | Teabag       | Supermarket     |
| 11                   | Taiwan                   | Bottle       | Supermarket     |
| 12                   | Taiwan                   | Bottle       | Supermarket     |
| 13                   | Taiwan                   | Bottle       | Supermarket     |
| 14                   | Taiwan                   | Bottle       | Supermarket     |
| 15                   | Taiwan                   | Tea shop     | Tea shop        |
| 16                   | Taiwan                   | Tea shop     | Tea shop        |
| 17                   | Vietnam                  | Loose Leaf   | Factory         |
| 18                   | Vietnam                  | Loose Leaf   | Factory         |
| 19                   | Vietnam                  | Tea shop     | Tea shop        |
| 20                   | India                    | Loose Leaf   | Factory         |
| 21                   | India                    | Loose Leaf   | Factory         |
| 22                   | India                    | Bottle       | Supermarket     |
| 23                   | India                    | Bottle       | Supermarket     |
| 24                   | India                    | Loose Leaf   | Supermarket     |
| 25                   | India                    | Bottle       | Supermarket     |
| 26                   | Indonesia                | Loose Leaf   | Factory         |
| 27                   | Kenya                    | Tea shop     | Tea shop        |
| 28                   | Kenya                    | Loose Leaf   | Factory         |
| 29                   | Sri Lanka                | Loose Leaf   | Factory         |
| 30                   | Sri Lanka                | Loose Leaf   | Factory         |
| 31                   | Sri Lanka                | Tea shop     | Tea shop        |
| 32                   | Sri Lanka                | Bottle       | Supermarket     |
| 33                   | Sri Lanka                | Loose Leaf   | Supermarket     |
| 34                   | Myanmar                  | Teabag       | Supermarket     |

Table S2. Concentration of PAH4 in black tea infusions from various countries.

| Country | Sample number | Concentration( $\mu\text{g/kg}$ ) |      |     |      |      | Transfer (%) |       |      |      |       |
|---------|---------------|-----------------------------------|------|-----|------|------|--------------|-------|------|------|-------|
|         |               | BaA                               | CHR  | BbF | BaP  | PAH4 | BaA          | CHR   | BbF  | BaP  | PAH4  |
| Taiwan  | 1             | ND <sup>1</sup>                   | ND   | ND  | ND   | ND   | 0.00         | 0.00  | 0.00 | 0.00 | 0.00  |
|         | 2             | ND                                | ND   | ND  | ND   | ND   | 0.00         | 0.00  | 0.00 | 0.00 | 0.00  |
|         | 3             | ND                                | ND   | ND  | ND   | ND   | 0.00         | 0.00  | 0.00 | 0.00 | 0.00  |
|         | 4             | ND                                | ND   | ND  | ND   | ND   | 0.00         | 0.00  | 0.00 | 0.00 | 0.00  |
|         | 5             | ND                                | ND   | ND  | ND   | ND   | 0.00         | 0.00  | 0.00 | 0.00 | 0.00  |
|         | 6             | 0.12                              | ND   | ND  | ND   | 0.12 | 47.13        | 0.00  | 0.00 | 0.00 | 20.12 |
|         | 7             | ND                                | ND   | ND  | ND   | ND   | 0.00         | 0.00  | 0.00 | 0.00 | 0.00  |
|         | 8             | ND                                | ND   | ND  | ND   | ND   | 0.00         | 0.00  | 0.00 | 0.00 | 0.00  |
|         | 9             | ND                                | 0.24 | ND  | ND   | 0.29 | 0.00         | 29.82 | 0.00 | 0.00 | 25.81 |
|         | 10            | ND                                | ND   | ND  | ND   | ND   | 0.00         | 0.00  | 0.00 | 0.00 | 0.00  |
|         | 11            | ND                                | ND   | ND  | ND   | ND   | -            | -     | -    | -    | -     |
|         | 12            | ND                                | ND   | ND  | ND   | ND   | -            | -     | -    | -    | -     |
|         | 13            | ND                                | ND   | ND  | ND   | ND   | -            | -     | -    | -    | -     |
|         | 14            | ND                                | ND   | ND  | ND   | ND   | -            | -     | -    | -    | -     |
|         | 15            | ND                                | ND   | ND  | ND   | ND   | -            | -     | -    | -    | -     |
|         | 16            | ND                                | ND   | ND  | ND   | ND   | -            | -     | -    | -    | -     |
|         | Mean          | 0.01                              | 0.01 | ND  | ND   | 0.02 | 4.71         | 2.98  | 0.00 | 0.00 | 4.59  |
| Vietnam | 17            | 0.13                              | ND   | ND  | ND   | 0.13 | 1.44         | 0.00  | 0.00 | 0.00 | 0.35  |
|         | 18            | ND                                | ND   | ND  | 0.04 | 0.04 | 0.00         | 0.00  | 0.00 | 0.37 | 0.08  |
|         | 19            | ND                                | ND   | ND  | 0.03 | 0.03 | -            | -     | -    | -    | -     |
|         | Mean          | 0.04                              | ND   | ND  | 0.02 | 0.07 | 0.72         | 0.00  | 0.00 | 0.18 | 0.22  |

<sup>1</sup>ND= Not Detected, <LOD.

Reference table S1 for sample number and origin.

Table S2. (continued) Concentration of PAH4 in black tea infusions from various countries.

|           |      | Concentration ( $\mu\text{g/kg}$ ) |      |     |      |      | Transfer (%) |      |      |      |      |
|-----------|------|------------------------------------|------|-----|------|------|--------------|------|------|------|------|
|           |      | BaA                                | CHR  | BbF | BaP  | PAH4 | BaA          | CHR  | BbF  | BaP  | PAH4 |
| India     | 20   | ND                                 | ND   | ND  | ND   | ND   | 0.00         | 0.00 | 0.00 | 0.00 | 0.00 |
|           | 21   | ND                                 | ND   | ND  | ND   | ND   | 0.00         | 0.00 | 0.00 | 0.00 | 0.00 |
|           | 22   | ND                                 | ND   | ND  | ND   | ND   | -            | -    | -    | -    | -    |
|           | 23   | ND                                 | ND   | ND  | ND   | ND   | -            | -    | -    | -    | -    |
|           | 24   | 0.21                               | 0.24 | ND  | ND   | 0.45 | 5.55         | 3.01 | 0.00 | 0.00 | 3.58 |
|           | 25   | ND                                 | ND   | ND  | ND   | ND   | -            | -    | -    | -    | -    |
|           | Mean | 0.04                               | 0.04 | ND  | ND   | 0.08 | 1.85         | 1.00 | 0.00 | 0.00 | 1.19 |
| Indonesia | 26   | ND                                 | ND   | ND  | ND   | ND   | 0.00         | 0.00 | 0.00 | 0.00 | 0.00 |
| Kenya     | 27   | ND                                 | ND   | ND  | ND   | ND   | -            | -    | -    | -    | -    |
|           | 28   | ND                                 | ND   | ND  | ND   | ND   | 0.00         | 0.00 | 0.00 | 0.00 | 0.00 |
|           | Mean | ND                                 | ND   | ND  | ND   | ND   | 0.00         | 0.00 | 0.00 | 0.00 | 0.00 |
| Sri Lanka | 29   | ND                                 | ND   | ND  | ND   | ND   | 0.00         | 0.00 | 0.00 | 0.00 | 0.00 |
|           | 30   | ND                                 | ND   | ND  | 0.05 | 0.05 | 0.00         | 0.00 | 0.00 | 2.29 | 0.29 |
|           | 31   | ND                                 | ND   | ND  | 0.03 | 0.03 | -            | -    | -    | -    | -    |
|           | 32   | 0.12                               | ND   | ND  | 0.03 | 0.15 | -            | -    | -    | -    | -    |
|           | 33   | ND                                 | ND   | ND  | ND   | ND   | 0.00         | 0.00 | 0.00 | 0.00 | 0.00 |
|           | Mean | 0.02                               | ND   | ND  | 0.02 | 0.05 | 0.00         | 0.00 | 0.00 | 0.76 | 0.10 |
| Myanmar   | 34   | ND                                 | ND   | ND  | ND   | ND   | 0.00         | 0.00 | 0.00 | 0.00 | 0.00 |
